# Supplementary material
Source: Springer Nature journal article supplement (https://www.springermedizin.de/resource/supplementary/12876_2010_629_MOESM2_ESM.pdf/9437428)

# Outcome

# Age Groups

Cancer

Less than 50 ▼

50 – 59 ▼

60 – 69 ▼

70 or more ▼

Advanced Adenoma

Less than 50 ■

50 – 59 ■

60 – 69 ■

70 or more ■

Polyps 6 – 9mm

Less than 50 ●

50 – 59 ●

60 – 69 ●

70 or more ●

Polyps < 6mm

Less than 50 ▲

50 – 59 ▲

60 – 69 ▲

70 or more ▲

OR=1

0 2 4 6 8 10 12 14

0 5 10 15 20

Prevalence (%)

Odds Ratio

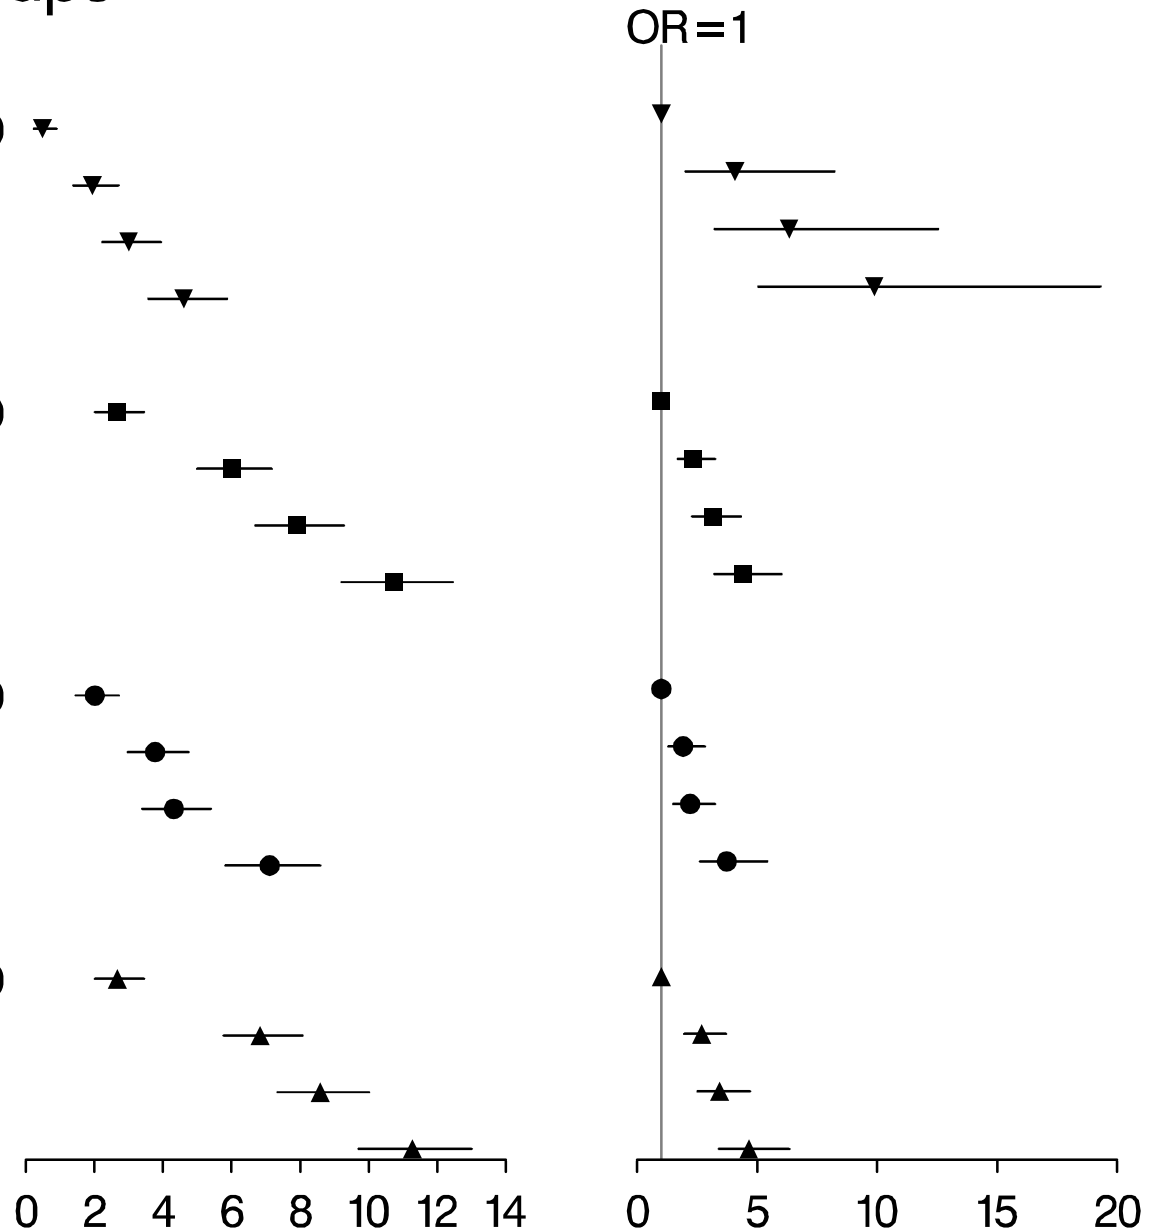

Supplement: MOESM2 [file 9437428]
